# Supplementary material for: Cocos nucifera (L.) (Arecaceae): A phytochemical and pharmacological review
Source: Braz J Med Biol Res. 2015 Aug 18;48(11):953–64. doi: 10.1590/1414-431X20154773 (PMC4671521; doi:10.1590/1414-431X20154773)
Supplement: Supplementary file 1 [file 1414-431X-bjmbr-48-11-00953-supp4773.pdf]

**Table S1.** Pharmacological Activities of various extracts of *Cocos nucifera* (L) and its fractions.

| Plant part | Type of extract/fraction                                                              | Study model/Tests                                                                                                                                                                                                                                                                                             | Doses                                                                                                   | Pharmacological activity                                                                                                                                                                                                                  | Ethnopharmacological claim                                                                             | References |
|------------|---------------------------------------------------------------------------------------|---------------------------------------------------------------------------------------------------------------------------------------------------------------------------------------------------------------------------------------------------------------------------------------------------------------|---------------------------------------------------------------------------------------------------------|-------------------------------------------------------------------------------------------------------------------------------------------------------------------------------------------------------------------------------------------|--------------------------------------------------------------------------------------------------------|------------|
| Husk fiber | Crude extract (CE); fractions (F1 e F2)                                               | Acetic acid-induced abdominal writhing ( <i>in vivo</i> ). Formalin, hot plate and tail-flick tests                                                                                                                                                                                                           | 50, 100 or 150 mg/kg, <i>po</i>                                                                         | Analgesic                                                                                                                                                                                                                                 | Use of husk fiber tea for pain.                                                                        | 44         |
| Husk fiber | Crude aqueous extract (CE)                                                            | Formalin-induced licking and subcutaneous air pouch ( <i>in vivo</i> ).                                                                                                                                                                                                                                       | 10, 50 or 100mg/kg, <i>po</i>                                                                           | Anti-inflammatory                                                                                                                                                                                                                         | Use of husk fiber tea for arthritis, diarrhea.                                                         | 45         |
| Husk fiber | Crude extract (CE) and fractions (F1 e F2)                                            | Rat paw edema test.                                                                                                                                                                                                                                                                                           | AE (50, 100,150 mg/kg), <i>po</i><br>F1: 1, 10 50 mg/kg), <i>po</i><br>F2: (1, 10, 50 mg/kg), <i>po</i> | Anti-inflammatory                                                                                                                                                                                                                         |                                                                                                        | 44         |
| Husk fiber | Liquid extracted from the bark of the green coconut (LBGC) and butanolic extract (BE) | Antihelminthic activity on mouse intestinal nematodes                                                                                                                                                                                                                                                         | LBGC (1000-2000 mg/kg), <i>po</i><br>BE (500-1000 mg/kg), <i>po</i>                                     | Antihelminthic                                                                                                                                                                                                                            |                                                                                                        | 28         |
| Husk fiber | Crude extract (CE) and fractions (FI-FV)                                              | Reduction of virus titers using TCID50 determinations ( <i>in vitro</i> ).                                                                                                                                                                                                                                    | 500 mg/mL                                                                                               | Antiviral                                                                                                                                                                                                                                 |                                                                                                        | 7          |
| Husk fiber | Crude methanol extract                                                                | Trichomonas vaginalis trophozoites were incubated in the presence of the crude extracts in dimethyl sulfoxide (DMSO).                                                                                                                                                                                         | 2.5-200 µg /mL                                                                                          | Antitrichomonal                                                                                                                                                                                                                           | Treatment of disorders of urogenital tract associated with infection by <i>T. vaginalis</i> .          | 24         |
| Husk fiber | Crude extract (CE) and fractions (FI-FV)                                              | The agar diffusion method ( <i>in vitro</i> ).                                                                                                                                                                                                                                                                | 500 mg/mL                                                                                               | Antimicrobial                                                                                                                                                                                                                             |                                                                                                        | 7          |
| Husk fiber | Crude aqueous extract (CE)                                                            | The agar diffusion method ( <i>in vitro</i> ).                                                                                                                                                                                                                                                                | 10, 50 or 100 mg/kg                                                                                     | Antimicrobial                                                                                                                                                                                                                             |                                                                                                        | 45         |
| Husk fiber | Aqueous extract (AE) and extract obtained with n-hexane (EnH)                         | Microorganism culture on agar;                                                                                                                                                                                                                                                                                | 25 mg/mL                                                                                                | Bacteriostatic or bactericidal                                                                                                                                                                                                            |                                                                                                        | 50         |
| Husk fiber | Aqueous extract fractions: A, B and C.                                                | Cytotoxicity against leukemic cells (MTT test).                                                                                                                                                                                                                                                               | 0, 5, 50 or 500 µg/mL.                                                                                  | Antileukemic                                                                                                                                                                                                                              |                                                                                                        | 63         |
| Husk fiber | Aqueous extract rich in polyphenols (AEP)                                             | <i>In vivo</i> : culture of parasites promastigotes of <i>L. amazonensis</i> . <i>In vitro</i> <i>L. amazonensis</i> promastigotas was incubated at 26°C for 120 h.                                                                                                                                           | 10 and 20 µg/mL of extract, not informed route of administration                                        | Leishmanicidal                                                                                                                                                                                                                            |                                                                                                        | 33         |
| Husk fiber | Ethyl acetate extract (EAE).                                                          | Promastigotes of <i>L. braziliensis</i> were inoculated in the right hind paw of hamsters. Paw edema test, the skin lesions and leukocyte parameters.                                                                                                                                                         | 300 mg/kg, <i>po</i>                                                                                    | Leishmanicidal                                                                                                                                                                                                                            |                                                                                                        | 35         |
| Endocarp   | Ethanol extract (RNM-1; RNM-2) Oily liquid obtained from the dry distillation (RNDS). | DPPH test. Nitric oxide radical scavenging. Alkaline DMSO method. Determination of total phenolic compounds, total flavonoids and tannins.                                                                                                                                                                    | Not informed doses or route of administration                                                           | Antioxidant                                                                                                                                                                                                                               |                                                                                                        | 48         |
| Endocarp   | Ethanol extracts, dry distilled extract and aqueous extract                           | Agar diffusion test was performed to evaluate antibacterial activity against <i>S. aureus</i> , <i>P. aeruginosa</i> , <i>K. pneumonia</i> , <i>E. coli</i> , <i>A. baumannii</i> , <i>Citrobacter freundii</i> , Enterococcus, <i>S. pyrogens</i> , <i>Bacillus subtilis</i> and <i>Micrococcus luteus</i> . | Not informed doses or route of administration                                                           | Antimicrobial activity of the endocarp extracts shows strong activity against <i>B. subtilis</i> , <i>P. aeruginosa</i> , <i>S. aureus</i> , <i>M. luteus</i> . Value of MIC was found between 300-350 µg/mL against <i>B. subtilis</i> . |                                                                                                        | 48         |
| Endocarp   | Ethanol extract (EE)                                                                  | <i>In vitro</i> : Aortic rings with and without endothelium.<br><i>In vivo</i> : Model of hypertension in uninephrectomized male rats with                                                                                                                                                                    | <i>In vitro</i> : 0.25-2 mg/mL<br><i>In vivo</i> : 300 mg/kg, <i>ip</i>                                 | Antihypertensive                                                                                                                                                                                                                          | The fruit of <i>Cocos nucifera</i> L. has long been used in folk medicine for the treatment of cardio- | 74         |

|                                              |                                                 |                                                                                                                                                                                                                                                                                                                                   |                                                                      |                                                                                                                                                                                                                                                            |                                                                                                                                                                          |    |
|----------------------------------------------|-------------------------------------------------|-----------------------------------------------------------------------------------------------------------------------------------------------------------------------------------------------------------------------------------------------------------------------------------------------------------------------------------|----------------------------------------------------------------------|------------------------------------------------------------------------------------------------------------------------------------------------------------------------------------------------------------------------------------------------------------|--------------------------------------------------------------------------------------------------------------------------------------------------------------------------|----|
| Mesocarp                                     | Mesocarp extract (MS)                           | induced salt.<br>Agar diffusion test                                                                                                                                                                                                                                                                                              | Not informed doses or route of administration                        | Antimicrobial                                                                                                                                                                                                                                              | metabolic diseases.<br>In the Indian subcontinent,<br>is used as hydration<br>therapy for cholera,<br>diarrhea and dysentery;<br>addition to the treatment of<br>cancer. | 49 |
| Coconut water                                | Not applicable                                  | Liver injury was induced by CCl <sub>4</sub> .<br>Tests and measurements: Liver<br>enzymes and oxidative stress                                                                                                                                                                                                                   | 6 mL/100 g of body weight.<br>Not informed route of administration   | Antioxidant                                                                                                                                                                                                                                                | Used for relief of fever,<br>intestinal disorder.<br>Oral rehydration.                                                                                                   | 59 |
| Coconut water                                | Virgin coconut oil (VCO)                        | Ovariectomized rats                                                                                                                                                                                                                                                                                                               | VCO 8% added to the regimen.<br>Not informed route of administration | Anti-osteoporosis                                                                                                                                                                                                                                          |                                                                                                                                                                          | 73 |
| Coconut water<br>of four varieties           | Not applicable                                  | Cell culture of lung fibroblasts to<br>study the effect of caffeic acid on<br>oxidative stress. DPPH assay,<br>scavenging of nitric oxide, TBARS<br>measurement.                                                                                                                                                                  | Not informed doses or route of administration                        | Antioxidant                                                                                                                                                                                                                                                |                                                                                                                                                                          | 57 |
| Coconut water                                | Not applicable                                  | Nephrolithiasis model Wistar rats.<br>Determination of lipid peroxidation,<br>SOD and catalase.<br>Chemical analysis of 24 h urine.<br>Analysis of renal function serum<br>sample.<br>Isolation of total RNA.                                                                                                                     | Not informed doses or route of administration                        | Nephroprotective                                                                                                                                                                                                                                           |                                                                                                                                                                          | 64 |
| Mature coconut<br>water (MCW)                | Not applicable                                  | Alloxan-induced diabetes model in<br>rats. Glucose, insulin and glycated<br>hemoglobin were estimated. Blood<br>urea was calculated. Concentration<br>of urinary nitrate, serum proteins was<br>calculated albumin, TGO and TGP<br>was estimated. Serum creatinine<br>and nitric oxide synthase (NOS)<br>activity were estimated. | 4 mL/100 g, intragastric.                                            | Reverses the increase in<br>the concentration of<br>urea, creatinine and<br>serum nitrite. Animals<br>receiving MCW +<br>glibenclamide showed<br>increased NOS activity<br>in the liver, as well as<br>increased plasma<br>concentration of<br>L-arginine. |                                                                                                                                                                          | 71 |
| Albumen solid                                | Crude methanol extract<br>(CME)                 | Animal model of malaria                                                                                                                                                                                                                                                                                                           | 50, 100, 200 and 400 mg/kg, <i>po</i>                                | Antiparasitic                                                                                                                                                                                                                                              | Treat malaria, fever,<br>taeniasis, schistosomiasis<br>and ancylostomiasis.                                                                                              | 25 |
| Protein of<br>albumen solid<br>coconut (CAP) | Not applicable                                  | Hypercholesterolemic rats                                                                                                                                                                                                                                                                                                         | 80 g CAP/kg diet. Not informed route of<br>administration            | Hypolipidemic and<br>antiperoxidative                                                                                                                                                                                                                      |                                                                                                                                                                          | 61 |
| Fresh roots                                  | Ethanol extract of<br><i>C. nucifera</i> (EECN) | Acetic acid-induced abdominal<br>writhing. Hot plate test.                                                                                                                                                                                                                                                                        | 40, 60 or 80 mg/kg, <i>ip</i>                                        | Analgesic                                                                                                                                                                                                                                                  |                                                                                                                                                                          | 41 |
| Fresh roots                                  | Ethanol extract of<br><i>C. nucifera</i> (EECN) | Pentylenetetrazole-induced seizures<br>model                                                                                                                                                                                                                                                                                      | 25-80 mg/kg, <i>ip</i>                                               | Anticonvulsant                                                                                                                                                                                                                                             |                                                                                                                                                                          | 41 |
| Fresh roots                                  | Ethanol extract of<br><i>C. nucifera</i> (EECN) | Test induced sleep pentobarbital,<br>meprobamate and diazepam in mice.                                                                                                                                                                                                                                                            | 40, 60 or 80 mg/kg, <i>ip</i>                                        | Potentialiation of<br>pentobarbital-induced<br>sleep.                                                                                                                                                                                                      |                                                                                                                                                                          | 41 |

MIC: minimum inhibitory concentration; DMSO: dimethyl sulfoxide; NOS: nitric oxide synthase; *ip*: intraperitoneal route; *po*: oral route.
